# Supplementary material
Source: PubMed Central journal article supplement (PMC6057818)
Supplement: NIHMS954677-supplement-supplement_1.pdf [file NIHMS954677-supplement-supplement_1.pdf]

**Supplemental Table I. ICD-9 diagnosis and CPT codes used to define comorbidities and amputations; list of antidepressants.**

| <b>Comorbid condition</b>                                 | <b>Codes used</b>                                                                                                                                                                                                                                                                                                                                                                             |
|-----------------------------------------------------------|-----------------------------------------------------------------------------------------------------------------------------------------------------------------------------------------------------------------------------------------------------------------------------------------------------------------------------------------------------------------------------------------------|
| Depression                                                | ICD9 diagnosis codes: 293.83, 296.21, 296.22, 296.23, 296.24, 296.25, 296.26, 296.30, 296.31, 296.32, 296.33, 296.34, 296.35, 296.36, 300.4, 311<br>Exclusion: 296.1, 296.90-296.99, 296.4-296.8, 243-244.2 & 244.8-244.9                                                                                                                                                                     |
| Hypertension                                              | ICD9 diagnosis codes: 401.0 - 406                                                                                                                                                                                                                                                                                                                                                             |
| Coronary Artery Disease (CAD)                             | ICD9 diagnosis codes: 410.0 or 414.9<br>ICD9 ProcedureCode:36.xx                                                                                                                                                                                                                                                                                                                              |
| Atrial Fibrillation                                       | ICD9 diagnosis codes: 427.31 or 427.32                                                                                                                                                                                                                                                                                                                                                        |
| Carotid artery stenosis                                   | ICD9 diagnosis codes: 433.00 - 433.91,433.1, 433.10, 433.3, 433.30, 433.11, 433.31, 433.9 ,433.90, 433.91, 435.8 ,435.9, 784.94, 368.12, 434.91 ,436 ,342, 368.11, 368.44, 362.84, 435 ,437, 443.21, 900.01, 781.4, V12.54, 784.5 ,780.4, 780.2 ,368.9, 781.3, 447.1, 447.9, V72.81,v72.83, v72.84, 362.xx<br><br>ICD9 Procedure Code: 00.63,38.12<br>CPT Code: 37215,37216,37217,0075T,35301 |
| Congestive Heart Failure (CHF)                            | ICD9 diagnosis codes: 428.0 - 428.9                                                                                                                                                                                                                                                                                                                                                           |
| Chronic Obstructive Pulmonary Disease (COPD)              | ICD9 diagnosis codes: 490,491.0, 491.1, 491.2, 491.20, 491.21, 491.22, 491.8, 491.9, 492.0, 492.8, 494, 494.0, 494.1, 496, 493.00, 493.01, 493.02, 493.10, 493.11, 493.12, 493.20, 493.21, 493.22, 493.81, 493.82, 494.90, 493.90, 493.92                                                                                                                                                     |
| Chronic Kidney Disease/End Stage Renal Disease (CKD/ESRD) | ICD9 diagnosis codes: 403.01, 403.11, 403.91, 404.02, 404.03, 404.12, 404.12, 404.13, 404.92, 404.93,585.5,585.6, V45.11, V45.12, V56.0, V56.1, V56.2, V56.32, V56.9,996.73<br><br>ICD9 Procedure Code: 38.95                                                                                                                                                                                 |
| Major Amputation                                          | ICD9 Procedure Code: 84.10, 84.14, 84.15,84.16, 84.17, 84.18, 84.19<br>CPT Code: 27290, 27295, 27590, 27591,27592,27598, 27880, 27881,27882, 28800,28805                                                                                                                                                                                                                                      |
| Antidepressants                                           | SSRI: Citalopram, Paroxetine, Escitalopram, Duloxetine, Sertraline, Fluoxetine<br>SNRI: Venlafaxine, Desvenlafaxine, Milnacipran<br>TCA/TeCA: Fluvoxamine, Trimipramine, Nortriptyline, Clomipramine, Amoxapine, Desipramine, Protriptyline, Amitriptyline<br>MAOI: Penelzine sulfate, Tranylcypromine, Isocarboxazid, Selegiline<br>Other: Mirtazapine, Trazodone, Nefazodone, Bupropion     |

**Supplemental Table II. Full results of Cox proportional hazards model for effect of depression on death and major amputations in PAD patients, stratified by antidepressant use. (N=129,157).**

| <u>Variable</u>                                                          | <u>Death</u>       | <u>Amputation</u>  |
|--------------------------------------------------------------------------|--------------------|--------------------|
|                                                                          | <u>HR (95% CI)</u> | <u>HR (95% CI)</u> |
| Depression and Antidepressants                                           |                    |                    |
| No Depression, No Antidepressants                                        | Ref.               | Ref.               |
| No Depression, Antidepressants for other indications                     | 1.18 (1.16 , 1.21) | 1.08 (1.03 , 1.14) |
| Depression, No Antidepressants                                           | 1.25 (1.18 , 1.33) | 1.42 (1.27 , 1.58) |
| Depression, Antidepressants                                              | 1.22 (1.19 , 1.26) | 1.10 (1.03 , 1.17) |
| Age (1-year increase)                                                    | 1.05 (1.05 , 1.05) | 0.98 (0.98 , 0.98) |
| <i>Race</i>                                                              |                    |                    |
| White                                                                    | Ref.               | Ref.               |
| Black                                                                    | 0.83 (0.81 , 0.85) | 1.43 (1.35 , 1.50) |
| Other                                                                    | 0.88 (0.81 , 0.95) | 1.14 (0.94 , 1.37) |
| Sex (Ref. Male)                                                          | 0.81 (0.76 , 0.87) | 0.44 (0.35 , 0.54) |
| <i>Smoking</i>                                                           |                    |                    |
| Never                                                                    | Ref.               | Ref.               |
| Current                                                                  | 1.27 (1.22 , 1.31) | 1.16 (1.06 , 1.27) |
| Former                                                                   | 1.08 (1.04 , 1.12) | 0.95 (0.86 , 1.05) |
| Unknown                                                                  | 1.14 (1.10 , 1.19) | 1.00 (0.91 , 1.10) |
| BMI (1 kg/m <sup>2</sup> increase)                                       | 0.97 (0.97 , 0.97) | 0.96 (0.96 , 0.97) |
| Creatinine (1 mg/dL increase)                                            | 1.09 (1.09 , 1.10) | 1.02 (1.00 , 1.04) |
| <i>Comorbidities (Ref. = No)</i>                                         |                    |                    |
| Diabetes                                                                 | 1.18 (1.14 , 1.23) | 1.73 (1.57 , 1.90) |
| Hypertension                                                             | 1.11 (1.08 , 1.14) | 1.27 (1.18 , 1.37) |
| CAD                                                                      | 1.20 (1.18 , 1.22) | 1.05 (1.00 , 1.10) |
| CHF                                                                      | 1.90 (1.86 , 1.95) | 1.52 (1.43 , 1.61) |
| COPD                                                                     | 1.33 (1.30 , 1.37) | 0.91 (0.83 , 0.99) |
| AF                                                                       | 1.36 (1.33 , 1.40) | 1.27 (1.19 , 1.36) |
| Carotid Disease                                                          | 1.09 (1.07 , 1.11) | 1.16 (1.10 , 1.22) |
| CKD or ESRD                                                              | 1.47 (1.42 , 1.53) | 1.68 (1.54 , 1.83) |
| Statin (Ref. None)                                                       | 0.76 (0.75 , 0.78) | 0.75 (0.71 , 0.78) |
| Antiplatelets (Ref. None)                                                | 0.71 (0.69 , 0.72) | 0.87 (0.83 , 0.93) |
| Antiglycemics (Ref. None)                                                | 1.17 (1.12 , 1.21) | 1.36 (1.24 , 1.49) |
| Cilostazol (Ref. No)                                                     | 0.92 (0.89 , 0.95) | 0.77 (0.69 , 0.85) |
| Antidepressants (Ref. None)                                              | -                  | -                  |
| <i>Median Income (Household) of Residential ZCTA (Ref. &gt;\$75,000)</i> |                    |                    |
| <=\$25,000                                                               | 1.37 (1.30 , 1.44) | 1.15 (1.01 , 1.30) |
| \$25,001-\$40,000                                                        | 1.15 (1.11 , 1.19) | 1.15 (1.06 , 1.25) |

|                                           |                    |                    |
|-------------------------------------------|--------------------|--------------------|
| \$40,001-\$75,000                         | 1.09 (1.05 , 1.12) | 1.04 (0.96 , 1.13) |
| <i>PAD Severity (Ref. = Claudication)</i> |                    |                    |
| Not Specified                             | 1.01 (0.99 , 1.04) | 1.15 (1.07 , 1.24) |
| Rest Pain                                 | 1.18 (1.12 , 1.24) | 2.58 (2.31 , 2.88) |
| Ulceration/Gangrene                       | 1.71 (1.65 , 1.77) | 8.16 (7.56 , 8.81) |
| Diagnosis Year (1-Year increase)          | 1.03 (1.03 , 1.03) | 1.10 (1.09 , 1.11) |

1 and end stage renal disease], antiplatelet medications, cilostazol, antiglycemics, statins, serum  
2 creatinine.

3

4 **Figure I. Cumulative incidence function (CIF) curves to compare amputation-free survival**  
5 **(AFS) by depression status (A) and use of antidepressants (B)**

6 Death was a competing risk and subjects were censored on December 31, 2015.

7 **Figure II. Kaplan Meier (KM) curves to compare Overall Survival (OS) by depression**  
8 **status (A) and use of antidepressants (B)**

9 Subjects were censored on December 31, 2015.

10 **Supplemental Table I. ICD-9 diagnosis and CPT codes used to define comorbidities and**  
11 **amputations; list of antidepressants.**

12

13 **Supplemental Table II. Full results of Cox proportional hazards model for effect of**  
14 **depression on death and major amputations in PAD patients, stratified by antidepressant**  
15 **use. (N=129,157).**

16 Abbreviations: HR, hazard ratio; CI, confidence interval, SD, standard deviation; IQR,  
17 interquartile range; BMI, body mass index; CAD, coronary artery disease; CHF, congestive heart  
18 failure; COPD, chronic obstructive pulmonary disease; AF, atrial fibrillation; CKD, chronic  
19 kidney disease; ESRD, end stage renal disease; mg, milligram; dL, deciliter; ZCTA, zip code  
20 tabulation area.

21

22
